# Supplementary material for: Increase of 4-Hydroxybenzoic, a Bioactive Phenolic Compound, after an Organic Intervention Diet
Source: PubMed Central journal article supplement (PMC6769758; doi:10.3390/antiox8090340), 2019-08-24
Supplement: antioxidants-08-00340-s001.pdf [file antioxidants-08-00340-s001.pdf]

**Table S1.** Baseline concentrations of inorganic elements in plasma (n = 38).

| <b>Elements</b> |             |
|-----------------|-------------|
| Na (mg/kg)      | 2990 ± 15   |
| K (mg/kg)       | 825 ± 9     |
| Ca (mg/kg)      | 88 ± 0      |
| Mg (mg/kg)      | 17 ± 0      |
| P (mg/kg)       | 104 ± 2     |
| Fe (µg/kg)      | 1304 ± 69   |
| Zn (µg/kg)      | 756 ± 24    |
| Cu (µg/kg)      | 837 ± 45    |
| As (µg/kg)      | 2.92 ± 0.68 |
| Pb (µg/kg)      | BLD         |
| Cd (µg/kg)      | BLD         |
| U (µg/kg)       | BLD         |

Data are mean ± SEM; BLD: below limit of detection.

**Table S2.** Baseline concentrations of urinary excretion of phenolic acids (n = 38).

| <b>Compounds</b>                |            |
|---------------------------------|------------|
| Phenylacetic acids              |            |
| 3,4-DHPAA (nmol)                | 68 ± 20    |
| 3-HPAA (nmol)                   | 2017 ± 871 |
| Homovanillic (nmol)             | 157 ± 38   |
| Phenylpropionic acids           |            |
| 3,4-HPPA (nmol)                 | 33 ± 20    |
| DHCA (nmol)                     | 2.1 ± 0.5  |
| Hydroxybenzoic and derivatives  |            |
| 4-HBA (nmol)                    | 196 ± 81   |
| 4-HH (nmol)                     | 389 ± 125  |
| Hippuric (nmol)                 | 1462 ± 156 |
| Hydroxycinnamic and derivatives |            |
| CA (nmol)                       | 9 ± 1      |
| <i>m</i> -Cou (nmol)            | 0.6 ± 0.2  |
| <i>p</i> -Cou (nmol)            | 0.6 ± 0.3  |

GA (nmol)  $1.17 \pm 0.87$

---

Data are mean  $\pm$  SEM. 3,4-DHPAA: 3,4-dihydroxyphenylacetic acid, 3-HPAA: 3-hydroxyphenylacetic acid, 3,4-HPPA: 3-(4-hydroxyphenyl) propionic acid, DHCA: dihydrocaffeic acid, 4-HBA: 4-hydroxybenzoic acid, 4-HH: 4-hydroxyhippuric, CA: caffeic acid, *m*-Cou: *m*-coumaric acid, *p*-Cou: *p*-coumaric acid, GA: gallic acid.

**Table S3.** Baseline concentrations of carotenes in plasma (n = 38).

| <b>Compounds</b>                |                 |
|---------------------------------|-----------------|
| $\alpha$ -carotene (nmol/mL)    | $0.35 \pm 0.08$ |
| $\beta$ -carotene (nmol/mL)     | $0.91 \pm 0.29$ |
| <i>E</i> -Lycopene (nmol/mL)    | $1.19 \pm 0.14$ |
| 5- <i>Z</i> -Lycopene (nmol/mL) | $0.26 \pm 0.03$ |

---

Data are mean  $\pm$  SEM.
